# Supplementary material for: Detecting In-Situ oligomerization of engineered STIM1 proteins by diffraction-limited optical imaging
Source: PLOS journal article supplement (doi:10.1371/journal.pone.0213655), 2019-03-25
Supplement: S12 (10.1371/journal.pone.0213655.s012) [file journal.pone.0213655.s012]

$$H_0 : \mu_1 = \mu_2 = \mu_3 = \mu_4 = \mu_5 = \mu_6$$

$H_1 : \text{Means are not equal}$

### Near the PM

|                                         |        |        |        |        |        |        |                       |  |
|-----------------------------------------|--------|--------|--------|--------|--------|--------|-----------------------|--|
| Number of clusters                      |        |        |        |        |        |        | 24                    |  |
| Total number of molecular entities, $N$ |        |        |        |        |        |        | 85                    |  |
| Number of oligomeric species, $k$       |        |        |        |        |        |        | 6                     |  |
|                                         | 1-fold | 2-fold | 3-fold | 4-fold | 5-fold | 6-fold | Grand Mean, $\bar{X}$ |  |
| Counts, $n_j$                           | 30     | 19     | 9      | 14     | 8      | 5      | 14.167                |  |
| Counts/Cluster, $\bar{X}_j$             | 1.250  | 0.792  | 0.375  | 0.583  | 0.333  | 0.208  | 0.590                 |  |

The test statistic\*,  $F_{\text{test}} = 3.875 > F \sim 2.3$  for  $df_1 = 5; df_2 = 79$  at  $\alpha = 0.05$  **REJECT  $H_0$**

$$*F_{\text{test}} = \frac{\sum n_j (\bar{X}_j - \bar{X})^2 / (k-1)}{\sum \sum (X - \bar{X}_j)^2 / (N-k)}$$
